# Supplementary material
Source: PubMed Central journal article supplement (PMC7060102)
Supplement: NIHMS1550107-supplement-1.pdf [file NIHMS1550107-supplement-1.pdf]

**Supplementary Table 1: Number of TAP patients per site**

| Institution                                                               | n  |
|---------------------------------------------------------------------------|----|
| Dana-Farber Cancer Institute, Boston, MA                                  | 19 |
| Memorial Sloan Kettering Cancer Center, New York, NY                      | 5  |
| Cleveland Clinic Foundation, Cleveland, OH                                | 4  |
| Fox Chase Cancer Center, Philadelphia, PA                                 | 2  |
| Columbia University Medical Center, New York, NY                          | 1  |
| University of Southern California, Los Angeles, CA                        | 1  |
| University of Michigan, Ann Arbor, MI                                     | 1  |
| University of Wisconsin School of Medicine and Public Health, Madison, WI | 1  |
