# Supplementary material
Source: PubMed Central journal article supplement (PMC7060102)
Supplement: NIHMS1550107-supplement-3.pdf [file NIHMS1550107-supplement-3.pdf]

**Supplementary Table 3: Type of surgical resection**

| <b>Type of surgery</b> | <b>n</b> | <b>Reason for surgery</b>                                                                                                                                                                                                                                                                  |
|------------------------|----------|--------------------------------------------------------------------------------------------------------------------------------------------------------------------------------------------------------------------------------------------------------------------------------------------|
| Segmental colectomy    | 7        | <ul style="list-style-type: none"><li>• intramucosal adenocarcinoma</li><li>• adenocarcinoma (unknown stage)</li><li>• pT1N0 adenocarcinoma</li><li>• pT1N0 adenocarcinoma</li><li>• pT3N0 adenocarcinoma</li><li>• large TVA with HGD</li><li>• &gt; 30 sessile serrated polyps</li></ul> |
| Total colectomy        | 4        | <ul style="list-style-type: none"><li>• pT1N1 with &gt; 30 polyps (mixed histology)</li><li>• &gt; 70 sessile serrated and adenomas</li><li>• &gt; 50 polyps (mixed histology)</li><li>• &gt; 40 adenomas</li></ul>                                                                        |
| Subtotal colectomy     | 2        | <ul style="list-style-type: none"><li>• pT2N0 adenocarcinoma</li><li>• “numerous sessile polyps”</li></ul>                                                                                                                                                                                 |
| Total proctocolectomy  | 1        | <ul style="list-style-type: none"><li>• “large area covered with flat polypoid tissue, multiple medium and large flat, carpet-like polyps”</li></ul>                                                                                                                                       |

**Supplementary Table 3** (excel file)
